# Supplementary material
Source: Research Square preprint supplement (doi:10.21203/rs.3.rs-9993693/v1)
Supplement: Supplementary file 1 [file a33e4149957bdf58e0af08c2.docx]

# Supplementary Information

**Asymmetric precursors modulate western North Pacific subtropical high** **predictability**

### Yuki Maeda1*, Masaki Satoh1,2

**1 Atmosphere and Ocean Research Institute, The University of Tokyo, Chiba, Japan**

**2 Typhoon Science and Technology Research Center, Yokohama National University, Kanagawa, Japan**

*Corresponding author: Yuki Maeda (E-mail: [maeda-y@aori.u-tokyo.ac.jp](mailto:maeda-y@aori.u-tokyo.ac.jp))

**Supplementary Fig. 1 | Characteristics of the WNPSH eddy index.**
**a**, Pressure–longitude structure of EOF1, averaged over latitude, from 1,000 to 250 hPa. **b**, Power spectrum of the WNPSH eddy index, together with the fitted red-noise spectrum (grey solid line) and the 95% confidence level (grey dashed line).

**Supplementary Fig.2 | Deep-learning architecture for probabilistic prediction of the WNPSH index.**
The model takes 11 input variables, each standardized as anomalies relative to climatology and stacked with lags over the preceding 5 days to form a four-dimensional input tensor. The architecture consists of three time–space 3D convolution layers followed by a multi-head attention layer, and then splits into two output branches that regress the predictive mean  and log standard deviation . Separate models are trained for each lead time  from 0 to 30 days. For each lead time, predictions are obtained from the mean of an ensemble of 10 independently initialized models.

**Supplementary Table 1 | Hyperparameters of the probabilistic deep learning model**.

| Component | Hyperparameter | Value |
| --- | --- | --- |
| Training | Batch size | for pre-training;  for fine-tuning |
| Optimizer | AdamW |
| Weight decay |  |
| Learning rate | for pre-training;  for fine-tuning |
| Learning-rate schedule | Linear warm-up  followed by cosine annealing |
| convolutional block | Kernel size |  |
| Channels |  |
| Stride |  |
| Dropout rate |  |
| Normalization | Batch normalization |
| Activation function | ReLU |
| Attention block | Projection dimension |  |
| Number of heads |  |
| Head dimension |  |
| Normalization | Layer normalization |
| Activation function | Softmax |
| Dropout rate |  |

**Supplementary Fig. 3 | Prediction of the WNPSH index.**Open blue circles denote the ensemble-mean prediction () from the DL model, shading denotes the predicted spread (), and the orange solid line denotes the reference based on reanalysis.​

**Supplementary Fig. 4 | Lead-time dependence of forecast RMSE by event sign.**
Red and blue lines indicate RMSE for positive and negative target events, respectively. Shading denotes the 95% confidence interval estimated from 1,000 bootstrap samples.

**Supplementary Fig. 5 | Hovmöller diagrams of Z850 for the development of the WNPSH core.**
Hovmöller diagrams of 850-hPa geopotential height anomalies averaged over 20–30°N, plotted as a function of longitude (0–180°E) and lag time (from day -14 to day 0), for positive and negative events in good and poor forecast cases. Contours denote anomalies at intervals of 10 m. Hatching marks regions significant at the two-sided 90% confidence level from Student’s t-tests.

**Supplementary Fig. 6 | Midlatitude Z200 Hovmöller diagrams.**
As in Supplementary Fig. 5, but for 200-hPa geopotential height anomalies averaged over 30–40° N. Contours denote anomalies at intervals of 10 m (zero contour included).

**Supplementary Fig. 7 | Midlatitude V200 Hovmöller diagrams.**
As in Supplementary Fig. 6, but for 200-hPa meridional wind anomalies. Contours denote anomalies at intervals of 2 ms-1.

**Supplementary Fig. 8 | Lagged composites of precursor fields for barrier events.**Same as Fig. 4 in the main text, but for the barrier events, defined as cases with poor DL predictions.

**Supplementary Fig. 9 | Lead-time dependence of predicted amplitudes for WNPSH peak events.**
Mean signed model output is shown for positive and negative WNPSH peak events that are well predicted (circles) or poorly predicted (crosses). Red and blue denote positive and negative events, respectively. Shading indicates the 95% confidence interval estimated from 1,000 bootstrap samples.

**Supplementary Fig. 10 | Integral Gradients contribution maps for the 9-day-lead model in a positive opportunity event.**
For each of the 11 input variables, the left and middle columns show the contributions to Δ𝜇 and Δ log𝜎, respectively, for a positive opportunity event. The right column shows the input fields.

**Supplementary Fig. 11 | Same as Supplementary Fig. 10, but for a negative opportunity event.**

**Supplementary Fig. 12 | Lead-time evolution of the Integral Gradients heat maps for Δ𝜇.**
As in Fig. 5 in the main text, but for lead times of 12, 9, 6 and 3 days.

**Supplementary Fig. 13 | As in Supplementary Fig. 12, but for Δlogσ.**
